# Supplementary material for: Not that innocent – ammonium ions boost homogeneous light-driven hydrogen evolution
Source: Royal Society of Chemistry journal article supplement (doi:10.1039/d2cc00339b), 2022-01-01
Supplement: d2cc00339b2.pdf [file d2cc00339b2.pdf]

|                            |                                         |                                                                                                                                                                       |                                                                                                                                                   |                                        |
|----------------------------|-----------------------------------------|-----------------------------------------------------------------------------------------------------------------------------------------------------------------------|---------------------------------------------------------------------------------------------------------------------------------------------------|----------------------------------------|
| <b>Chemical Parameters</b> | <b>purity</b>                           | reagent purity: > 98 %                                                                                                                                                |                                                                                                                                                   |                                        |
|                            | <b>concentrations and molar amounts</b> | Photosensitizer:                                                                                                                                                      | [Ru(bpy) <sub>3</sub> ]PF <sub>6</sub> / [Ru( <sup>tert</sup> butyl-bpy) <sub>3</sub> ] <sup>2+</sup> / [Ir(ppy) <sub>2</sub> (bpy)] <sup>+</sup> | <i>c</i> = 20 μM, <i>n</i> = 160 nmol  |
|                            |                                         | Catalyst:                                                                                                                                                             | Na <sub>2</sub> [Mo <sub>3</sub> S <sub>13</sub> ](H <sub>2</sub> O) <sub>5</sub>                                                                 | <i>c</i> = 0.3 μM, <i>n</i> = 2.4 nmol |
|                            |                                         | Catalyst:                                                                                                                                                             | Co(dmgH) <sub>2</sub> PyCl                                                                                                                        | <i>c</i> = 4 μM, <i>n</i> = 32 nmol    |
|                            |                                         | Sacrificial Reagent:                                                                                                                                                  | Ascorbic Acid / N-benzyl-1,4-dihydronicotineamide                                                                                                 | <i>c</i> = 10 mM, <i>n</i> = 80 μmol   |
|                            |                                         | Solvent/buffer:                                                                                                                                                       | 9:1 sovent:water (v:v), solvent is MeOH or Acetone                                                                                                |                                        |
|                            | <b>pH-value/proton concentration</b>    | pH 4 or pH 6                                                                                                                                                          |                                                                                                                                                   |                                        |
| <b>Reactor</b>             | <b>materials</b>                        | borosilicate glass                                                                                                                                                    |                                                                                                                                                   |                                        |
|                            | <b>geometry</b>                         | Schlenk tube                                                                                                                                                          |                                                                                                                                                   |                                        |
|                            | <b>dimensions</b>                       | <i>h</i> = 15 cm, <i>d</i> = 2 cm, <i>V ca.</i> 21 mL                                                                                                                 |                                                                                                                                                   |                                        |
| <b>Experimental Setup</b>  | <b>positioning</b>                      | light-beam path perpendicular to reactor glass wall, <i>d</i> (light-source, front reactor wall) = 0 cm, two custom-built LED-sticks opposing each other, air cooling |                                                                                                                                                   |                                        |

|                               |                         |                                                           |                                           |  |
|-------------------------------|-------------------------|-----------------------------------------------------------|-------------------------------------------|--|
| <b>Operation Conditions</b>   | reaction volume         | $V = \text{ca } 21 \text{ mL}$                            | headspace: $V = \text{ca } 13 \text{ mL}$ |  |
|                               | temperature             | $T = 22 \text{ }^\circ\text{C}$ , throughout the reaction |                                           |  |
|                               | atmosphere and pressure | argon atmosphere, $p_0 = 998 - 1002 \text{ mbar}$         |                                           |  |
|                               | operation mode          | batch mode                                                |                                           |  |
|                               | stirring speed          | no stirring                                               |                                           |  |
|                               | flow rates              | n.a.                                                      |                                           |  |
|                               | reaction time           | 6 h                                                       |                                           |  |
| <b>Light Source</b>           | Wavelength              | $\lambda_{\text{max}} = 470 \text{ nm}$                   |                                           |  |
|                               | Power                   | $P \sim 40 \text{ mW cm}^{-2}$                            |                                           |  |
| <b>Performance Indicators</b> | $\Delta n$ (product)    | see main manuscript                                       |                                           |  |
|                               | TON                     | see main manuscript                                       |                                           |  |
|                               | TOF                     | see main manuscript                                       |                                           |  |
